# Supplementary material for: Engineered IL-21 Cytokine Muteins Fused to Anti-PD-1 Antibodies Can Improve CD8+ T Cell Function and Anti-tumor Immunity
Source: PubMed Central journal article supplement (PMC7225340; doi:10.3389/fimmu.2020.00832), 2020-05-08
Supplement: Data_Sheet_1.pdf [file Data_Sheet_1.pdf]

# Supplementary Figure 1.

A.

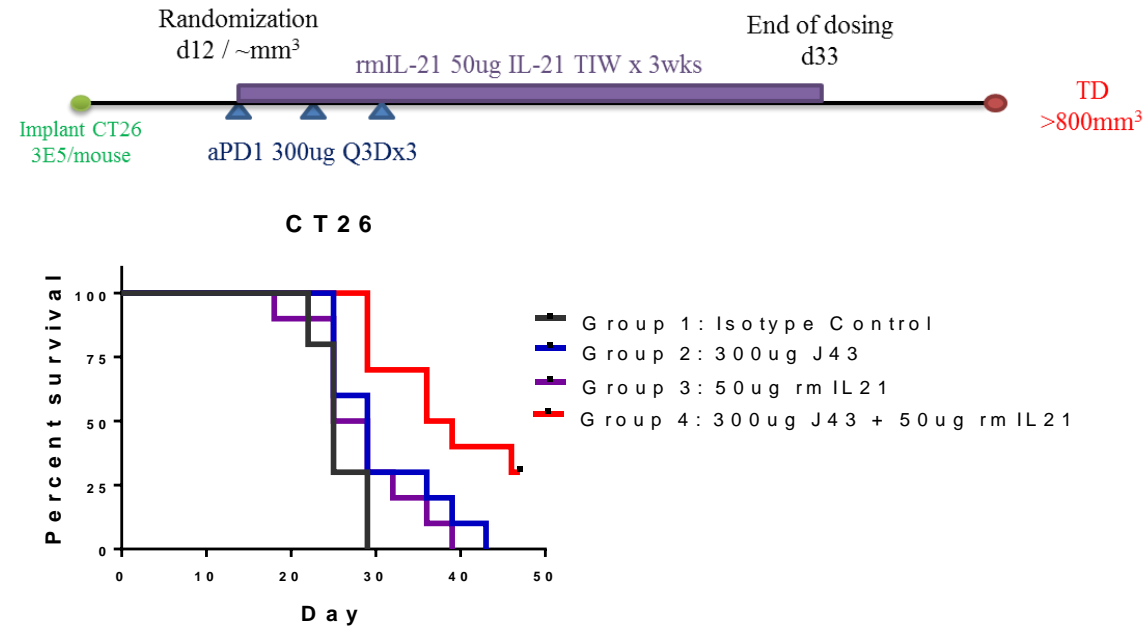

**Supplementary Figure 1.** *In vivo* activity of a combination of IL-21 and anti-PD-1 mAb and impact of free IL-21 on dendritic cells. (A) Survival analysis of CT26 tumor bearing Balb/c female ( $N = 10$  per group) mice administered either anti-PD-1 mAb alone, free WT IL-21 or a combination of free WT IL-21 and anti-PD-1 mAb.  $N = 10$  Balb/C,  $P$  values of log-rank (Mantel-Cox) test were as follows;  $P = 0.0002$  (Isotype IgG1 vs rmIL-21 + anti-PD-1 (J43)),  $P = 0.0408$  (Isotype vs anti-PD-1 (J43)),  $P = 0.1269$  (Isotype vs rmIL-21),  $P = 0.0143$  (anti-PD-1 (J43) vs rmIL-21 + anti-PD-1 (J43)),  $P = 0.0047$  (rmIL-21 vs rmIL-21 + anti-PD-1 (J43)). \* $P < 0.05$ , \*\* $P < 0.01$ , \*\*\* $P < 0.001$ .

## Supplementary Figure 2.

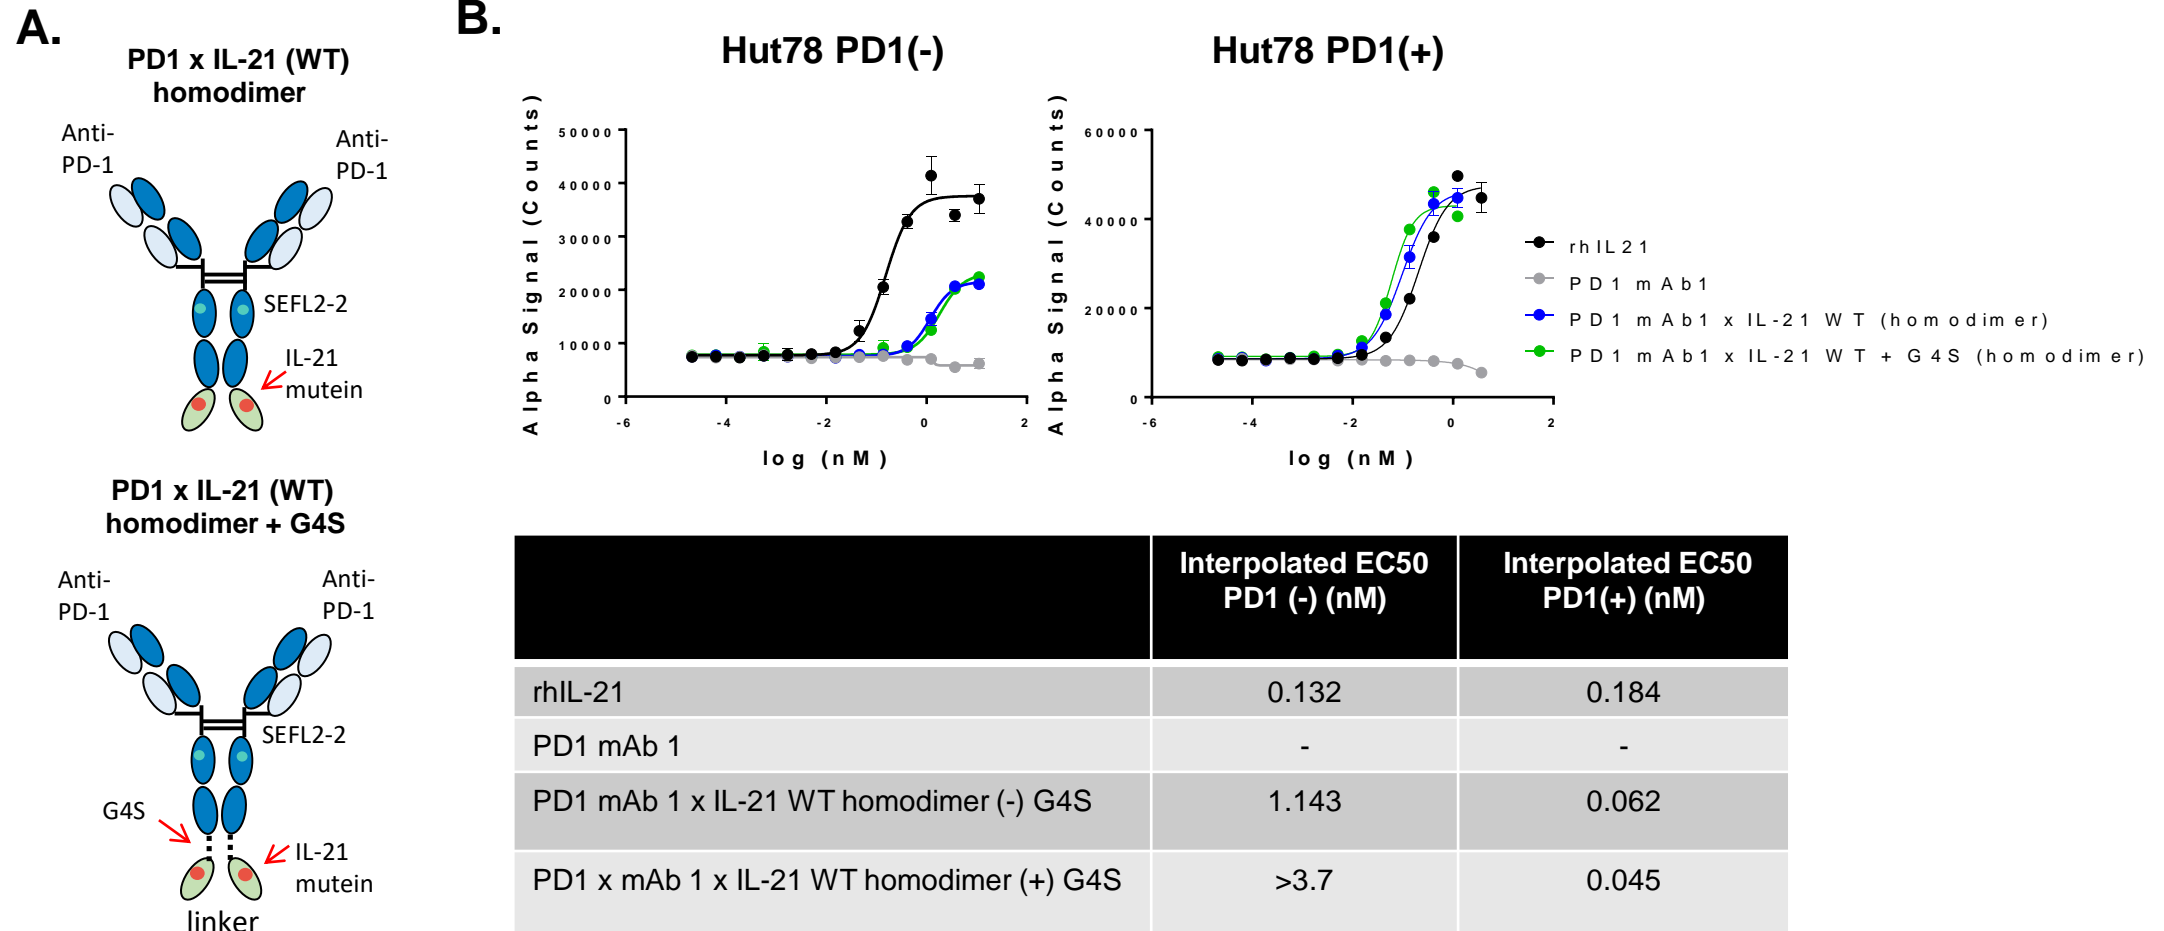

**Supplementary Figure 2.** Anti-PD-1 x IL-21 bifunctional fusion protein designs and activity. (A) Schematic representation of IL-21 fusion protein designs. (B) Activity of fusion proteins expressed as homodimer or monomer with or without linker and compared to free WT IL-21 in Hut78 PD-1(-) cells (left panel) and engineered Hut78 PD-1 (+) cells (right panel) monitored using STAT3 phosphorylation (AlphaLISA) as a surrogate measure of IL-21 activity.

## Supplementary Figure 3.

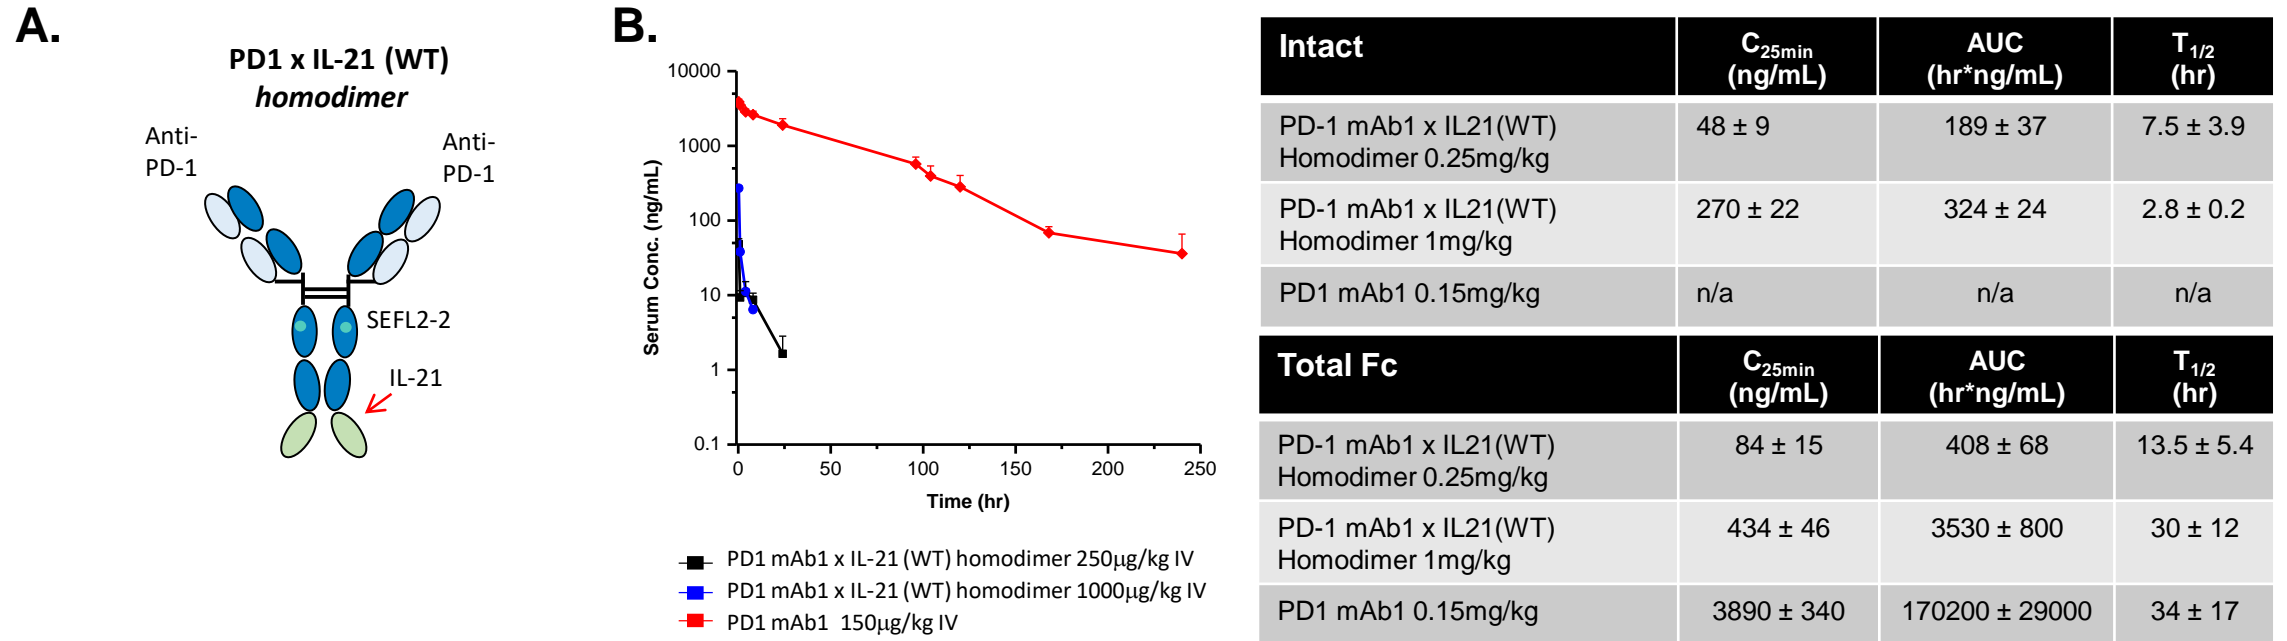

**Supplementary Figure 3.** Pharmacokinetic profile of anti-PD-1 x IL-21 WT fusion protein in cynomolgus monkeys. (A) Schematic representation of fusion protein with WT IL-21 fused to C-terminus as homodimer. (B) Mean plasma concentration-time profiles (upper left panel) of WT IL-21 fusion proteins dosed at (single dose) 250 µg/kg or 1000 µg/kg or parent mAb dosed 150 µg/kg (left panel) and parent anti-PD-1 mAb, with summary of pharmacokinetic parameters (right panel).  $N = 2$  cynomolgus monkeys / group in B.

Supplementary Figure 4.

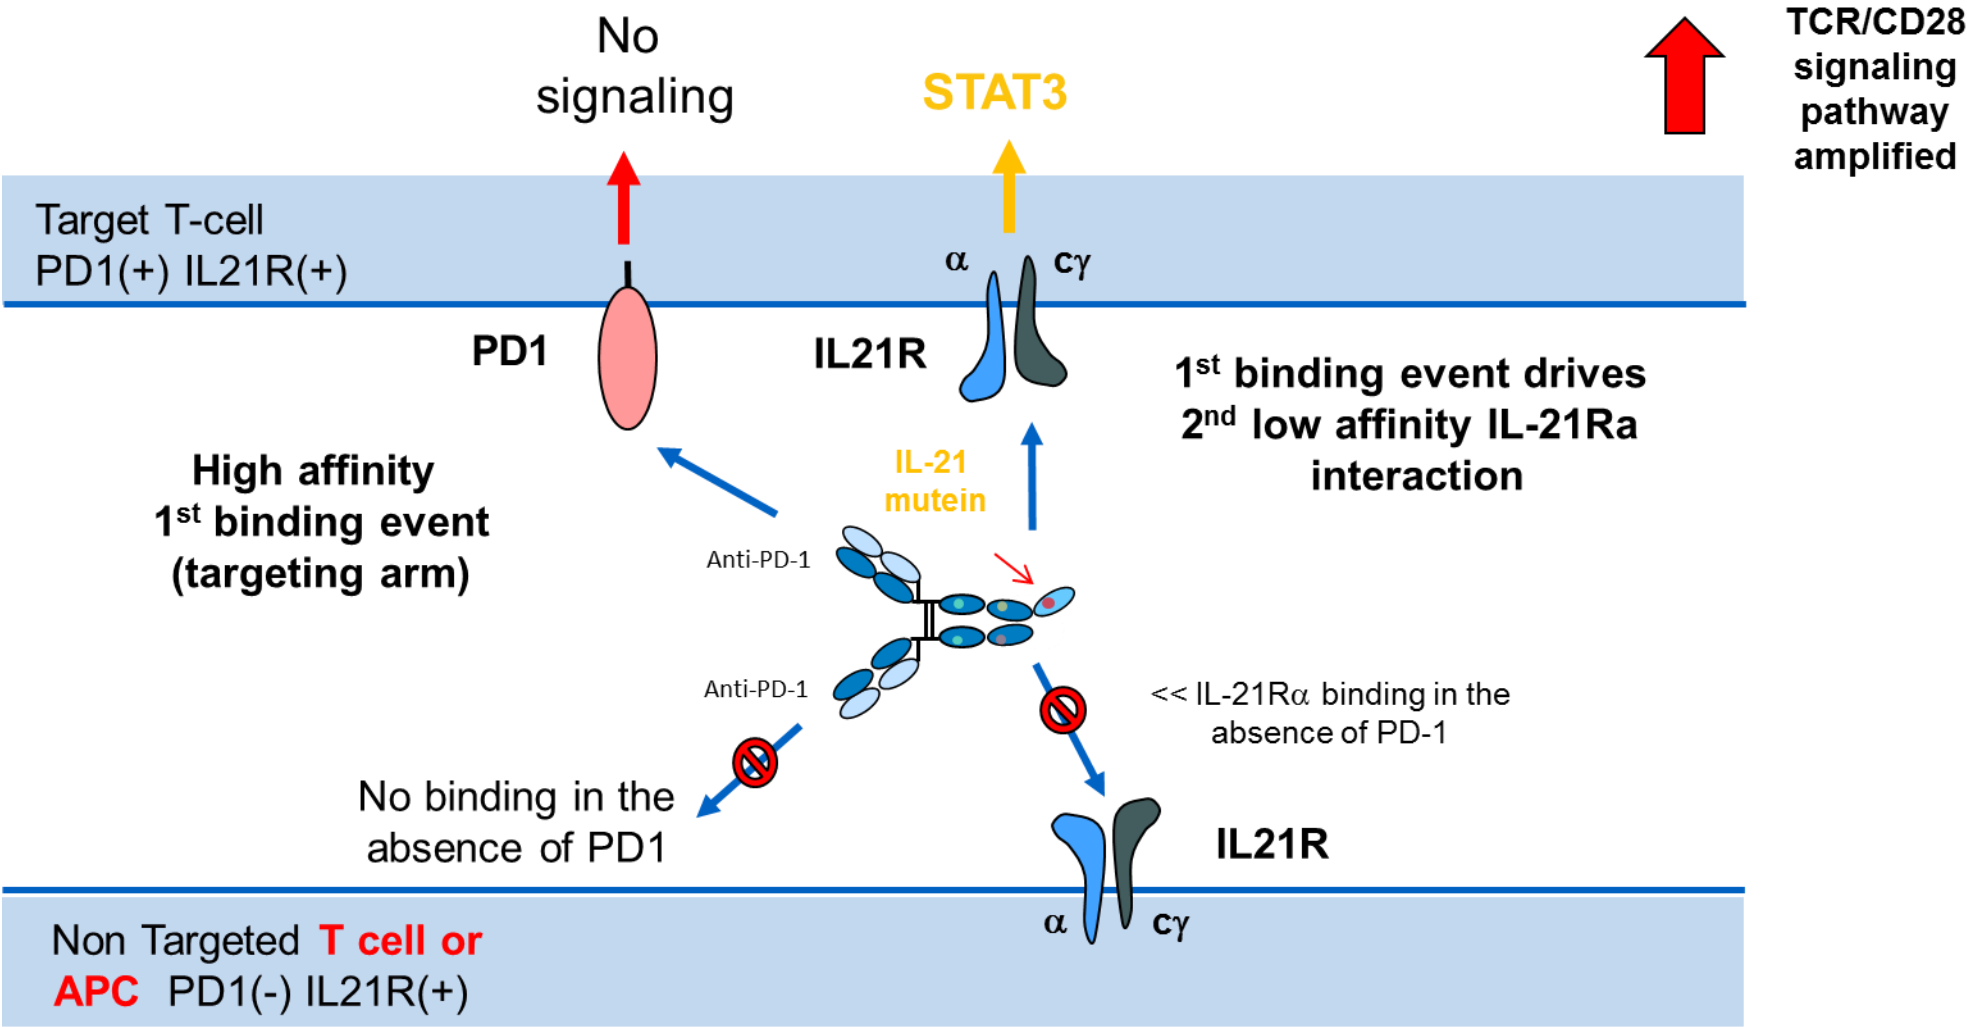

Supplementary Figure 4. Design criteria for anti-PD-1 x IL-21 fusion proteins

# Supplementary Figure 5.

**A.**

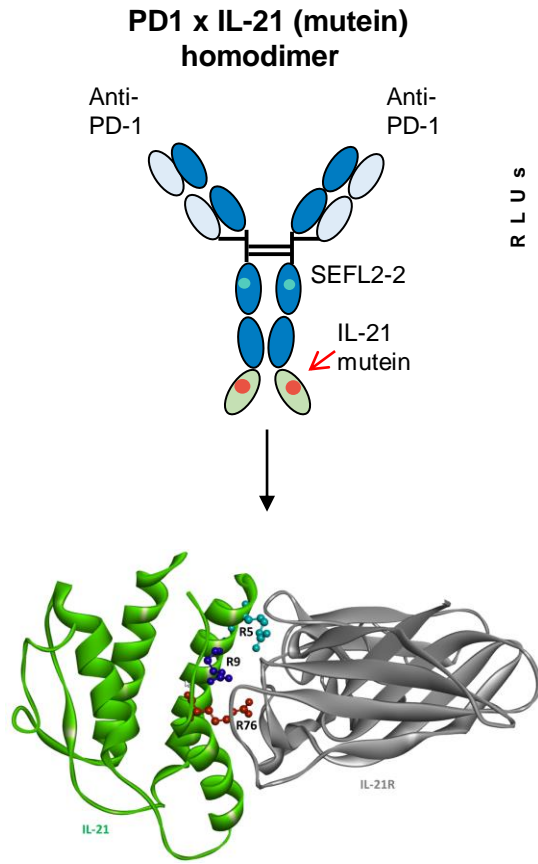

**B.**

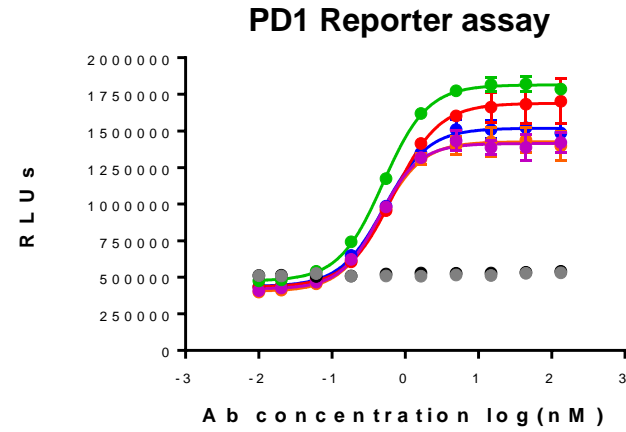

|                                | Interpolated EC50 (nM) |
|--------------------------------|------------------------|
| rhIL-21                        | -                      |
| PD1 mAb 2                      | 0.546                  |
| PD1 mAb 2 x R5E:R76A homodimer | 0.478                  |
| PD1 mAb 2 x R9E:R76A homodimer | 0.752                  |
| PD1 mAb 2 x R5A:R76E homodimer | 0.503                  |
| PD1 mAb 2 x R5Q:R76E homodimer | 0.566                  |

**C.**

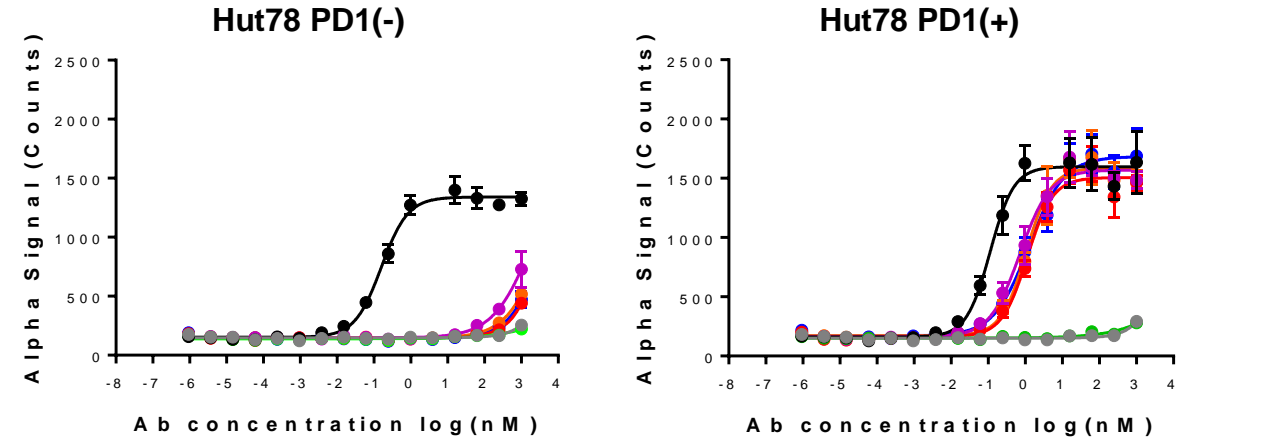

|                                | Hut78 PD1- Interpolated EC50 (nM) | Hut78 PD1+ Interpolated EC50 (nM) |
|--------------------------------|-----------------------------------|-----------------------------------|
| rhIL-21                        | 0.129                             | 0.092                             |
| PD1 mAb 2                      | -                                 | -                                 |
| PD1 mAb 2 x R5E:R76A homodimer | >1000                             | 0.527                             |
| PD1 mAb 2 x R9E:R76A homodimer | >1000                             | 0.778                             |
| PD1 mAb 2 x R5A:R76E homodimer | >1000                             | 0.733                             |
| PD1 mAb 2 x R5Q:R76E homodimer | >1000                             | 0.897                             |

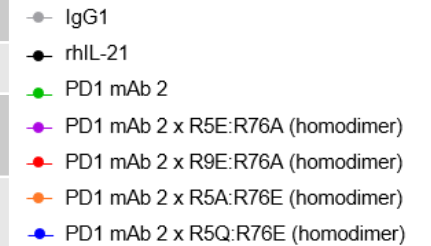

**Supplementary Figure 5.** Design and characterization of IL-21 variants with dual amino acid substitutions. (A) Schematic representation of fusion protein with dual amino acid IL-21 muteins fused to C-terminus as monomer (upper panel) and key amino acid residues in IL-21 (lower panel). (B) Potency of dual amino acid substitution IL-21 variants fused to anti-PD-1 mAb as monomer and parental mAb in blocking PD-1/L1 interaction monitored using Promega PD-1/L1 bioassay. (C) Activity of dual amino acid substitution IL-21 variants fused to anti-PD-1 mAb as monomer compared to free WT IL-21 in Hut78 PD-1(-) cells (left panel) and engineered Hut78 PD-1 (+) cells (right panel) monitored using STAT3 phosphorylation (AlphaLISA) as a surrogate measure of IL-21 activity.

# Supplementary Figure 6.

A.

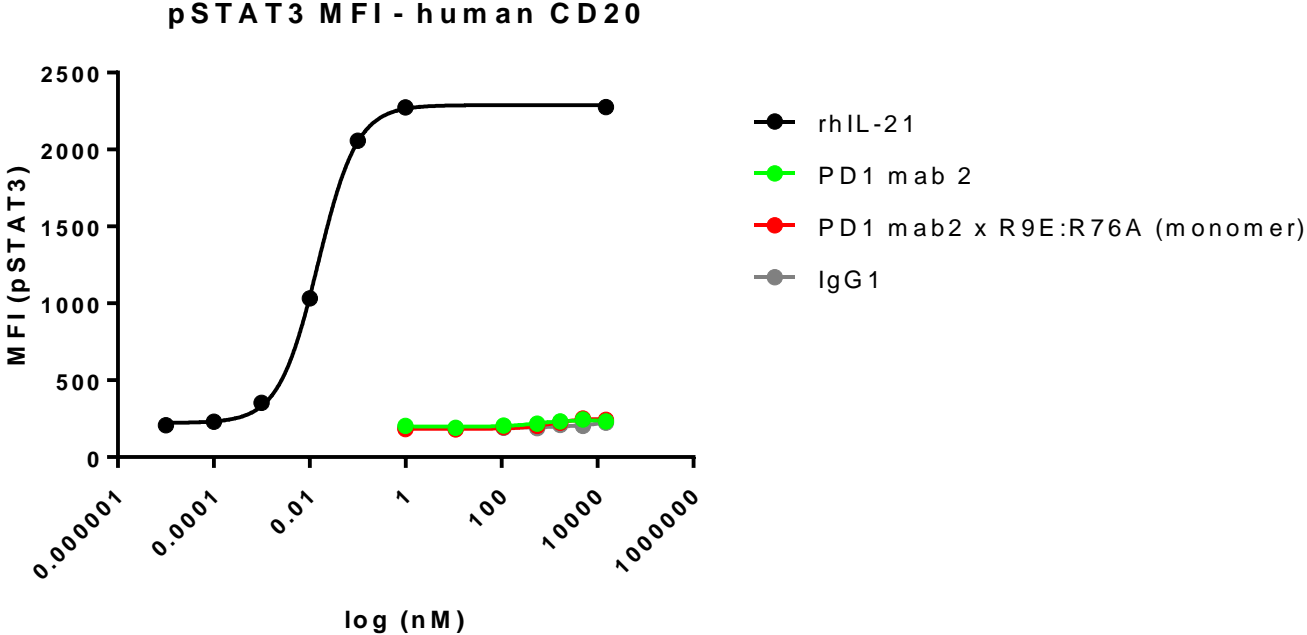

**Supplementary Figure 6.** Activity of dual amino acid substitution variant R9E:R76A on B cells. (A) STAT3 phosphorylation B cells after stimulation for 10 min with free WT IL-21, fusion protein variant R9E:R76A or parental anti-PD-1 mAb, assessed by flow cytometry.

# Supplementary Figure 7 for text Table 4.

**Supplementary Figure 7.** ForteBio Octet affinity characterization sensorgrams are shown for seven samples: (1) negative control IgG1, (2) recombinant human IL-21 (rhIL-21) and four test articles (3) parent PD-1 mAb 2, (4) PD-1 mAb 2 x R5Q:R76E Homodimer, (5) PD-1 mAb 2 x R5Q:R76E monomer, (6) PD-1 mAb 2 x R9E:R76A Homodimer and (7) PD-1 mAb 2 x R9E:R76A monomer. The samples were tested for binding to the four soluble receptors (A) human IL-21R (huIL-21R), (B) cynomolgus monkey IL-21R (cyIL-21R), (C) human PD-1 (huPD-1) and (D) cynomolgus monkey PD-1 (cyPD-1). Sensorgrams are shown for the seven samples binding to the four soluble receptors except for rhIL-21 which was only used as a positive control for IL-21R binding and was not tested for PD-1 binding. Each sensorgram shows processed data and corresponding 1:1 model fit as described in methods.

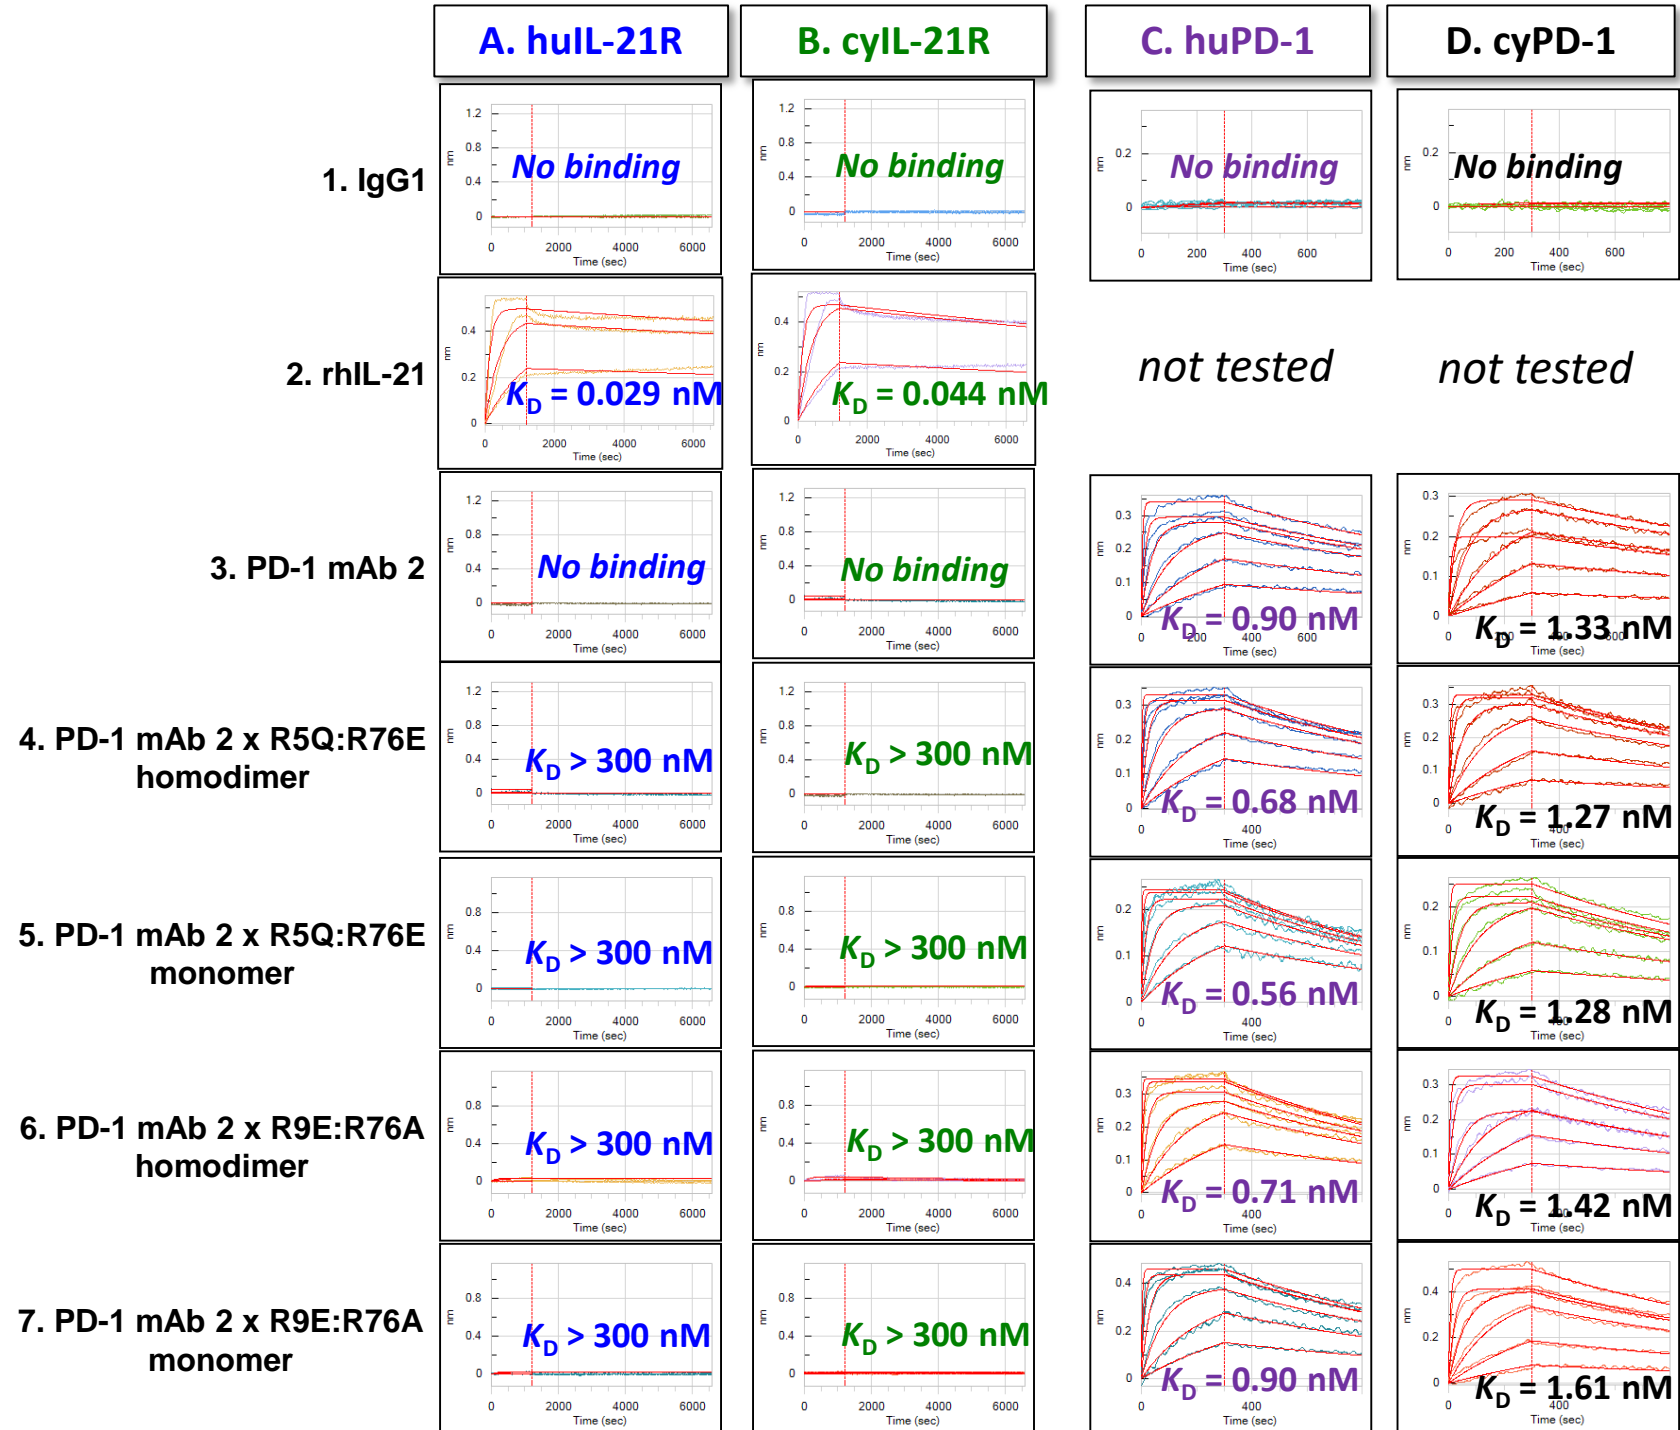

# Supplementary Figure 8.

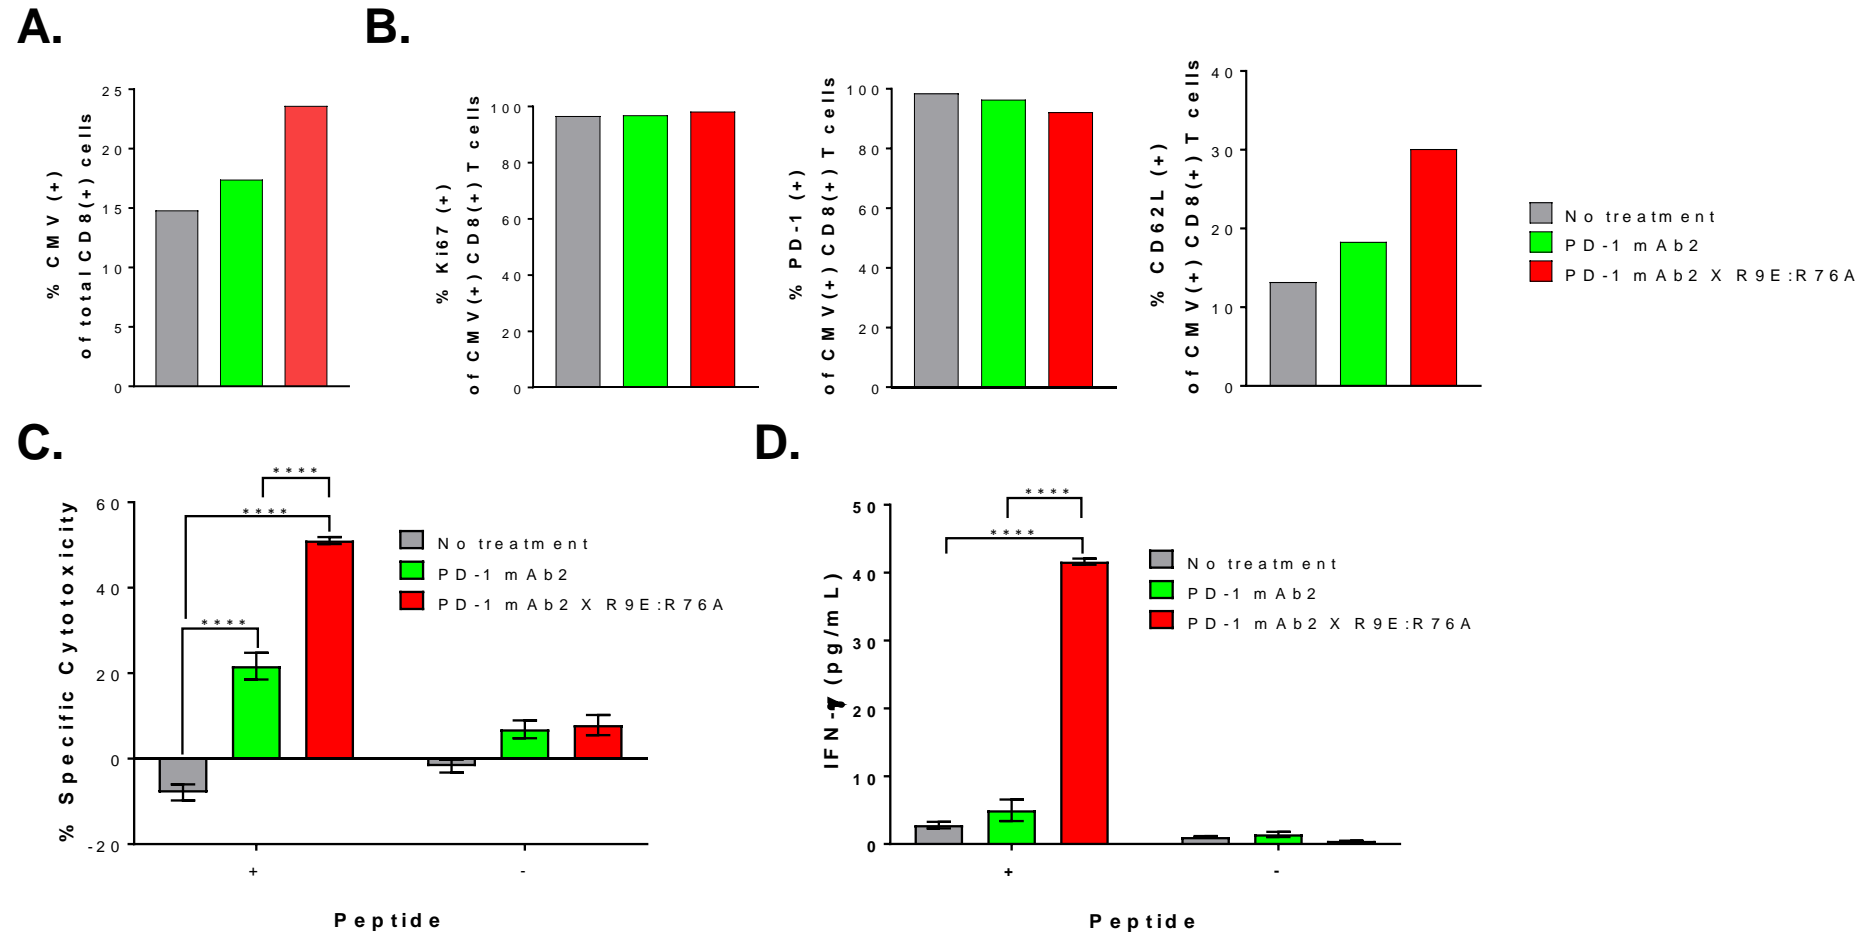

**Figure 8.** Characterization of PD-1 x IL-21 fusion protein activity on CTLs. CTLs expanded under indicated priming conditions. Five days post priming proportions of (A) CMV antigen specific CTLs and (B) Ki67 (left-panel), PD-1 (middle-panel) and L-selectin (CD62L, right-panel) was analyzed by FACS analysis. CTLs primed under different conditions were isolated and cocultured with peptide pulsed melanoma cells for 36 hrs to examine (C) cytotoxicity against peptide-loaded melanoma cells, determined by measuring luciferase activity and (D) CTL IFN-gamma production. Experiments in (C) and (D) were conducted in triplicates and the error bars represent SEM. P values were calculated using one-way Anova with a Tukey's multiple comparison test. P values: \*\*\*\*<math><0.0001</math>, \*\*\*<math><0.001</math>, \*\*<math><0.01</math>.



## Supplementary Figure 9.

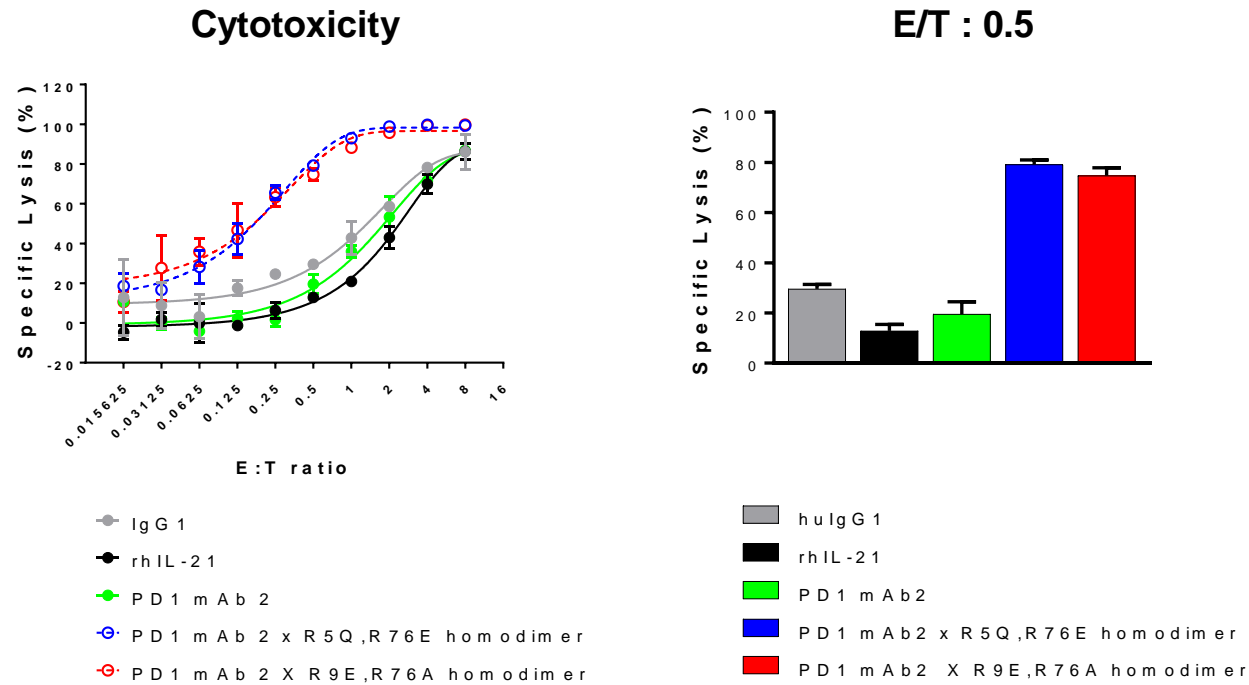

**Supplementary Figure 9.** Characterization of IL-21 variants with dual amino acid substitutions. Cytotoxicity of CTLs against luciferase labelled melanoma cells was measured after a 7-day treatment of CTLs with CD3/28 and fusion proteins, free- WT IL-21 or parent mAb. Expanded CTLs were co-cultured with peptide pulsed melanoma cells and after 3 days of coculture, cytotoxicity was determined by measuring luciferase activity.

|                                  | Hut78 PD-1 (-)<br>Interpolated<br>EC50 (nM) | Hut78 PD-1(+)<br>Interpolated<br>EC50 (nM) | PD-1 reporter<br>Interpolated<br>EC50 (nM) | huIL-21R<br>KD (nM) | muIL-21R<br>KD (nM) | huPD-1<br>KD (nM) | muPD-1<br>KD (nM) |
|----------------------------------|---------------------------------------------|--------------------------------------------|--------------------------------------------|---------------------|---------------------|-------------------|-------------------|
| IgG1                             | -                                           | -                                          | -                                          | -                   | -                   | -                 | -                 |
| rhIL-21                          | 0.009                                       | 0.009                                      | -                                          | 0.052               | ~90                 | -                 | -                 |
| PD-1 mAb 3                       | -                                           | -                                          | 2.035                                      | -                   | -                   | 3.4               | -                 |
| PD-1 mAb 3 x R9E:R76A<br>monomer | >1000                                       | 1.97                                       | 1.613                                      | >300                | -                   | 2.6               | -                 |

**Supplementary Table 1.** Summary of *in vitro* attributes of anti-PD-1 x IL-21 double *muteins*
